# Supplementary material
Source: MDPI journal article supplement (https://www.mdpi.com/2075-4701/9/9/991)
Supplement: s1 [file s1]

## Supplementary materials

### A study on the effect of ambient air plasma treatment on properties of perovskite films

Masoud Shekargoftar\*, Jana Jurmanová, and Tomáš Homola

R&D Centre for Low-Cost Plasma and Nanotechnology Surface Modifications (CEPLANT), Department of Physical Electronics, Faculty of Science, Masaryk University, Kotlářská 267/2, 611 37 Brno, Czech Republic

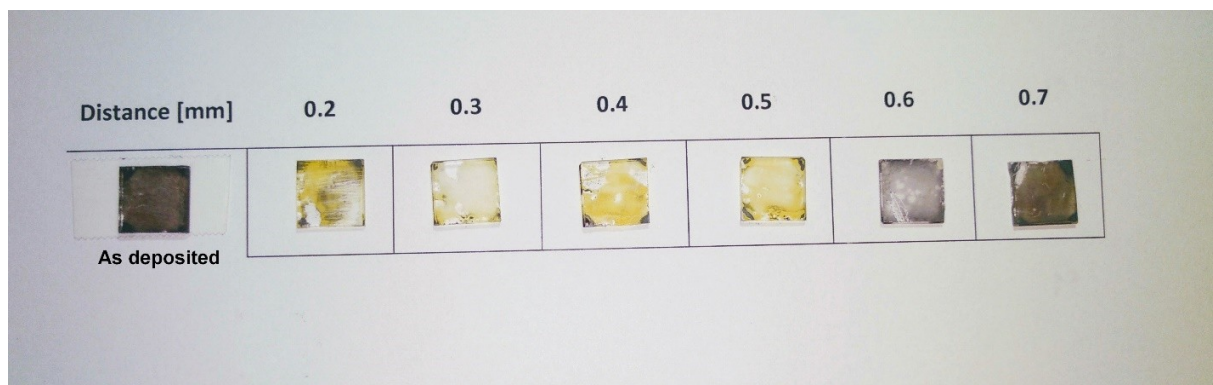

*Figure S1. The photo of plasma treated perovskite films with different distances.*

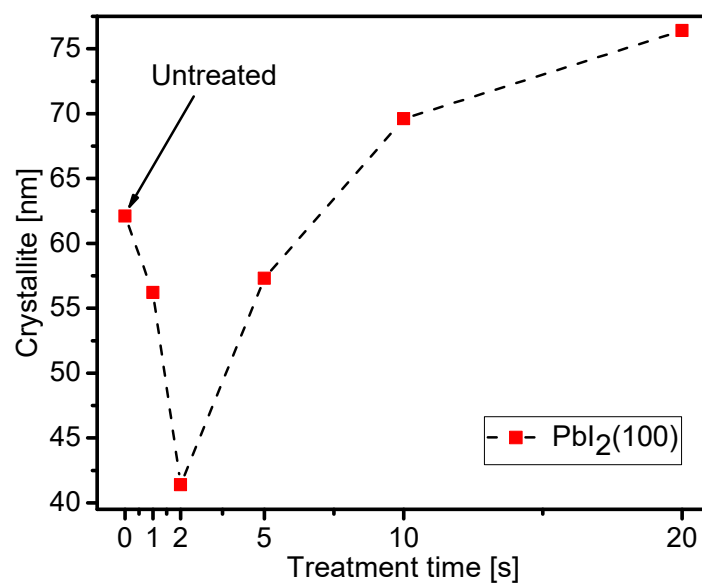

**Figure S2.** Crystallite size of  $\text{PbI}_2$  at plate of (100) before and after plasma treatment.

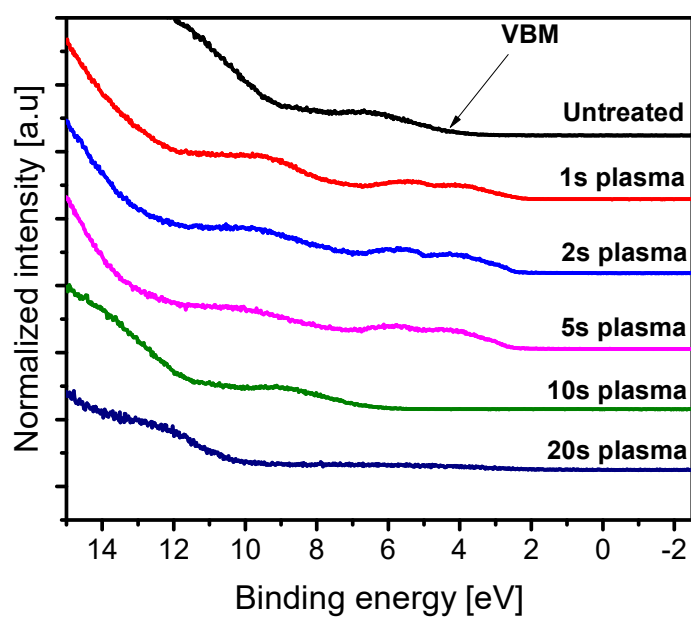

**Figure S3.** Variation of valance bands of mixed-halide perovskite film during plasma treatment.

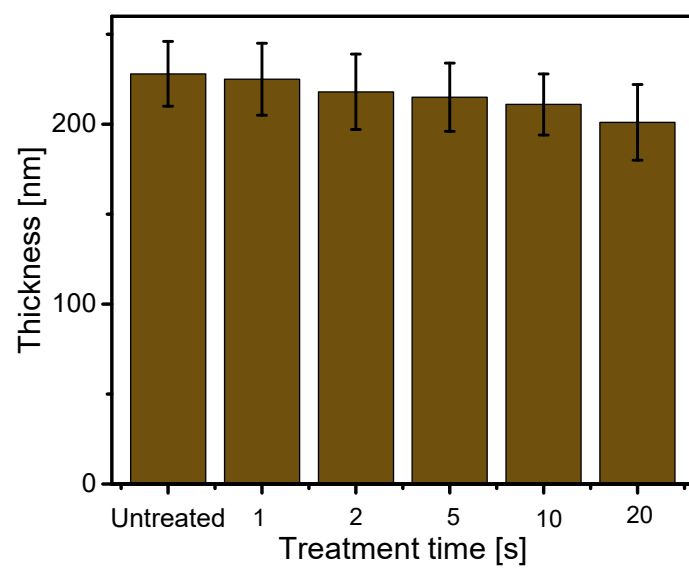

*Figure S4. Variation the thickness of mixed-halide perovskite during plasma treatment time.*
